# Supplementary material for: Gas6 expression is reduced in advanced breast cancers
Source: PubMed Central journal article supplement (PMC7181799; doi:10.1038/s41698-020-0116-z), 2020-04-24
Supplement: 41698_2020_116_MOESM1_ESM.pdf [file 41698_2020_116_MOESM1_ESM.pdf]

# Supplementary Figure 1

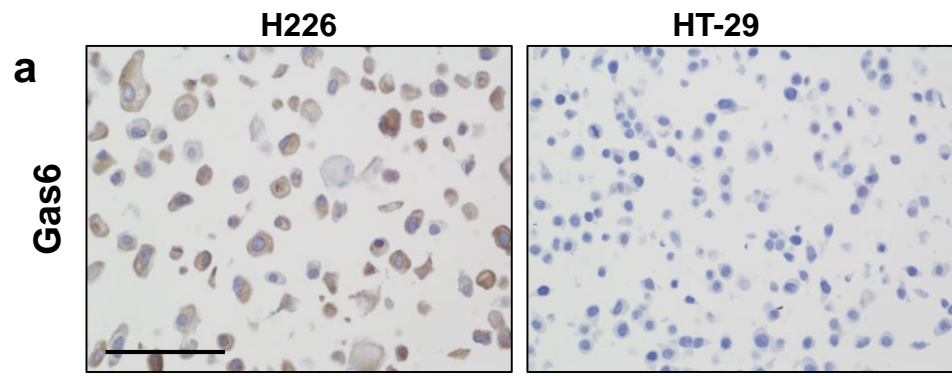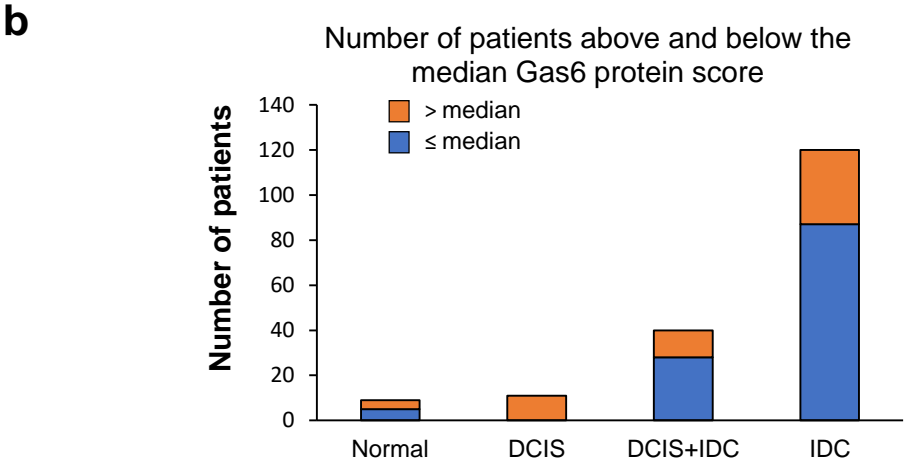

**Chi-squared test comparing normal adjacent vs all other groups.**

| Normal versus | Unadjusted p from exact $c^2$ | Adjusted p-value |
|---------------|-------------------------------|------------------|
| DCIS          | 0.0081                        | significant      |
| DCIS+IDC      | 0.5459                        | ns               |
| IDC           | 0.2448                        | ns               |

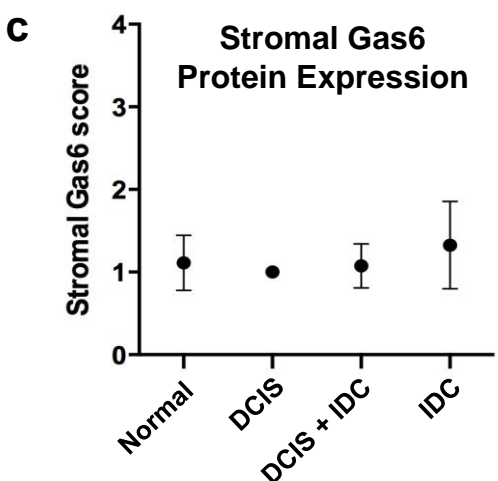

**Supplementary Figure 1: Gas6 protein expression during breast cancer progression**

**a** Immunohistochemical staining of Gas6 in paraffin-embedded cell pellets: NCI-H226 (Gas6 positive control) and HT-29 (negative control). Scale bar=50  $\mu$ m. **b** Graph shows the number of patients above and below the median Gas6 score. Table shows the corresponding pairwise comparison using Chi-square analysis to assess statistical significance between normal and each of the other groups. ns = nonsignificant. **c** Representation of stromal Gas6 score (0: negative, 1: low, 2: moderate and 3: high) in normal, pure DCIS, DCIS + IDC, and IDC alone. Error bars are SEM, and Chi-squared analysis showed no statistical difference between normal breast and other tissues.

# Supplementary Figure 2

**a**

## Gas6 mRNA

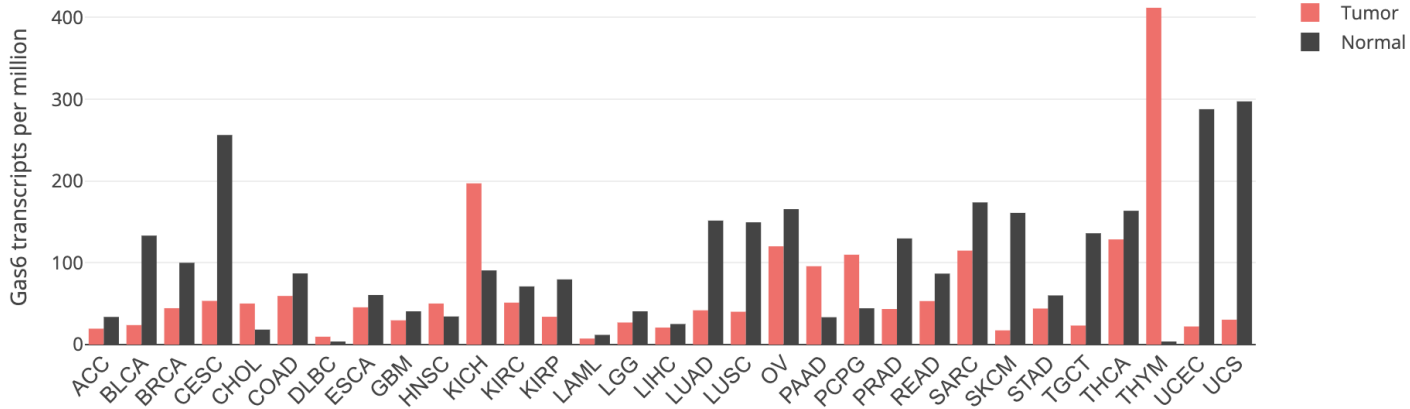

- ACC Adrenocortical carcinoma
- BLCA Bladder Urothelial Carcinoma
- BRCA Breast invasive carcinoma**
- CESC Cervical squamous cell carcinoma and endocervical adenocarcinoma**
- CHOL Cholangio carcinoma
- COAD Colon adenocarcinoma
- DLBC Lymphoid Neoplasm Diffuse Large B-cell Lymphoma
- ESCA Esophageal carcinoma
- GBM Glioblastoma multiforme
- HNSC Head and Neck squamous cell carcinoma
- KICH Kidney Chromophobe
- KIRC Kidney renal clear cell carcinoma
- KIRP Kidney renal papillary cell carcinoma
- LAML Acute Myeloid Leukemia
- LGG Brain Lower Grade Glioma
- LIHC Liver hepatocellular carcinoma
- LUAD Lung adenocarcinoma
- LUSC Lung squamous cell carcinoma
- OV Ovarian serous cystadenocarcinoma**
- PAAD Pancreatic adenocarcinoma
- PCPG Pheochromocytoma and Paraganglioma
- PRAD Prostate adenocarcinoma
- READ Rectum adenocarcinoma
- SARC Sarcoma
- SKCM Skin Cutaneous Melanoma
- STAD Stomach adenocarcinoma
- TGCT Testicular Germ Cell Tumors
- THCA Thyroid carcinoma
- THYM Thymoma
- UCEC Uterine Corpus Endometrial Carcinoma**
- UCS Uterine Carcinosarcoma**

**b**

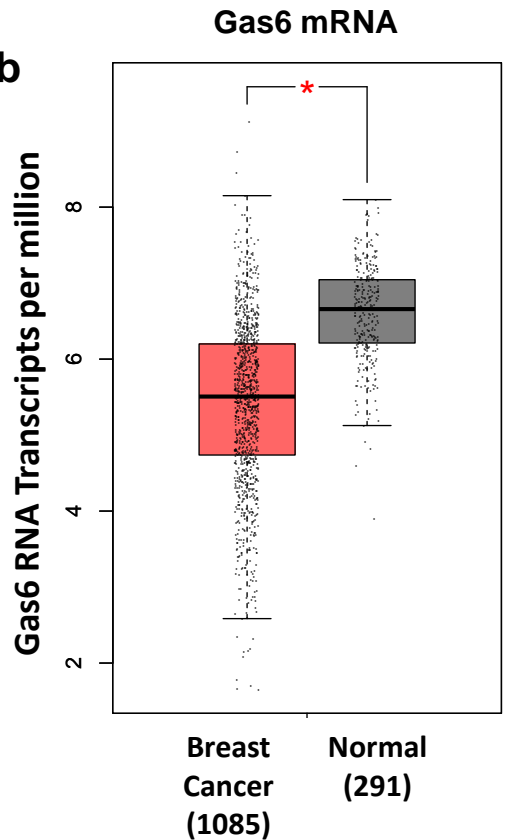

## Supplementary Figure 2: Gas6 mRNA in normal and cancer tissues

**a** Gene expression profile across all tumor samples and paired normal tissues. Bars represent the median expression of tumor type or normal tissue. **b** A boxplot showing the mean transcripts per million for Gas6 mRNA in 291 normal breast tissues in contrast to 1085 from breast cancer tissues showing a significant reduction in Gas6 RNA in cancer tissues (unpaired t-test, \* $p < 0.01$ ). Graphs were generated from GEPIA database.

# Supplementary Figure 3

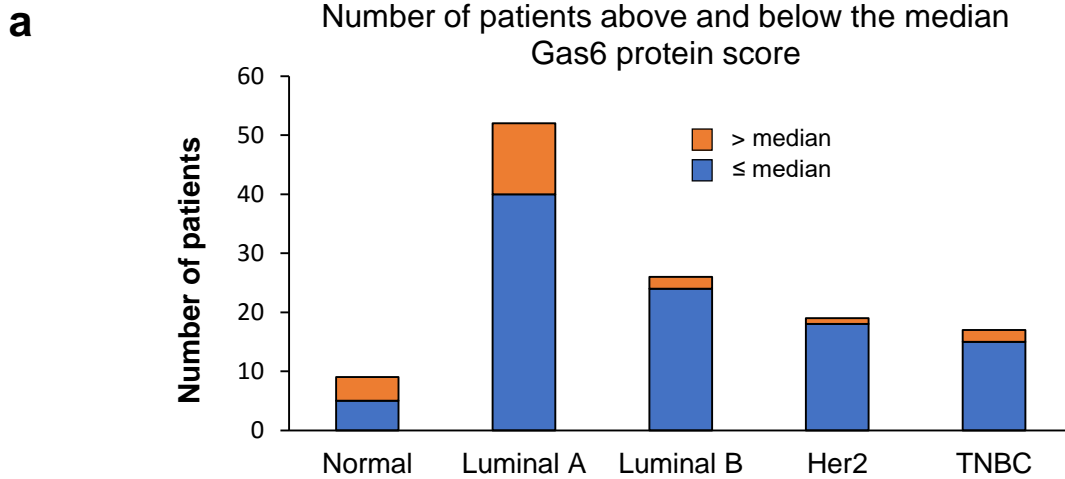

Chi-squared test comparing Normal adjacent vs all other groups.

| Normal versus | Unadjusted p from exact $c^2$ | Adjusted p-value |
|---------------|-------------------------------|------------------|
| Luminal A     | 0.2964                        | ns               |
| Luminal B     | 0.0123                        | ns               |
| Her2          | 0.0254                        | ns               |
| TNBC          | 0.0879                        | ns               |

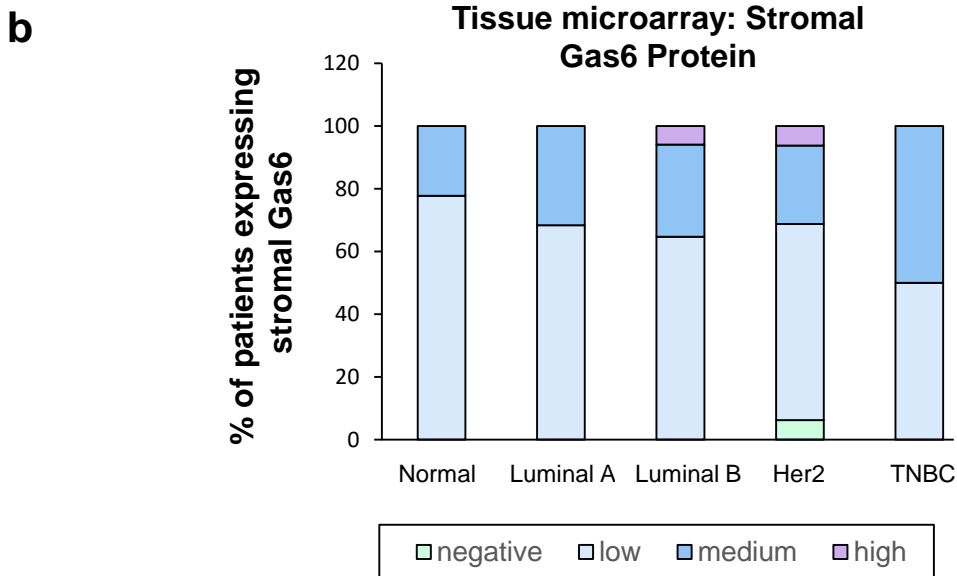

## Supplementary Figure 3: Gas6 protein expression in breast cancer subtypes

**a** Number of patients above and below the median Gas6 score, and the corresponding pairwise comparison using Chi-squared test (table) to assess statistical significance between normal breast and each of the other groups. ns = not significant. **b** Graph depicts quantitation Gas6 protein staining of TMAs, expressed as the percentage (%) of patients expressing epithelial Gas6 protein in different molecular subtypes: normal breast (n=10), luminal A (n=39), luminal B (n=18), Her2<sup>+</sup> (n= 19), and TNBC (n=19).

## Supplementary Figure 4

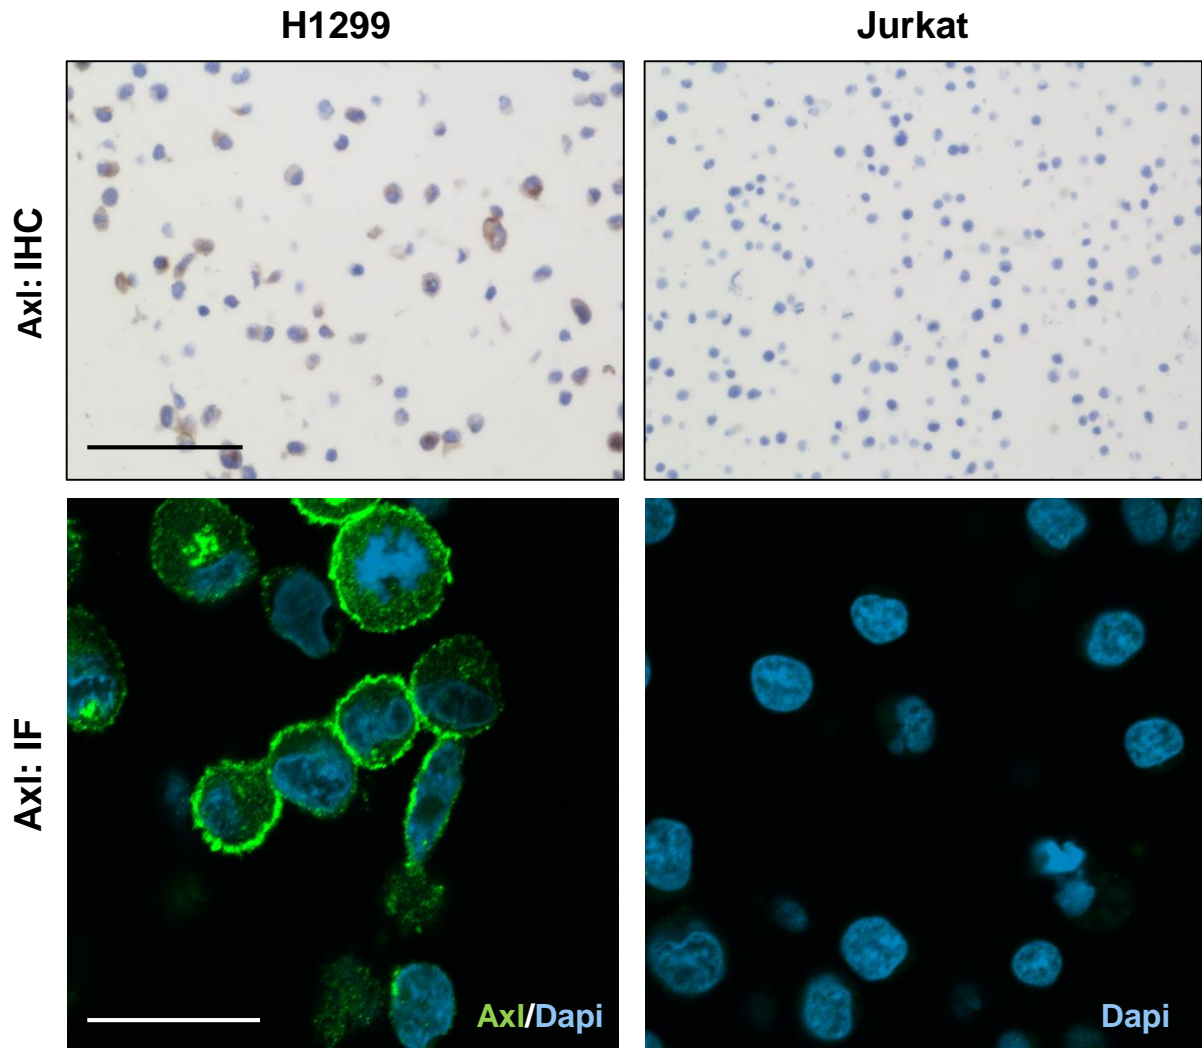

### Supplementary Figure 4: Axl antibody validation in paraffin-embedded cell pellets

Images show immunohistochemical (top) and immunofluorescent (bottom) staining using the same antibody to Axl in paraffin-embedded cell pellets H1299 (Axl-positive cell line) and Jurkat (Axl-negative cell line). Scale bar=50  $\mu\text{m}$  (top), 20  $\mu\text{m}$  (bottom).

# Supplementary Figure 5

**a**

## METABRIC

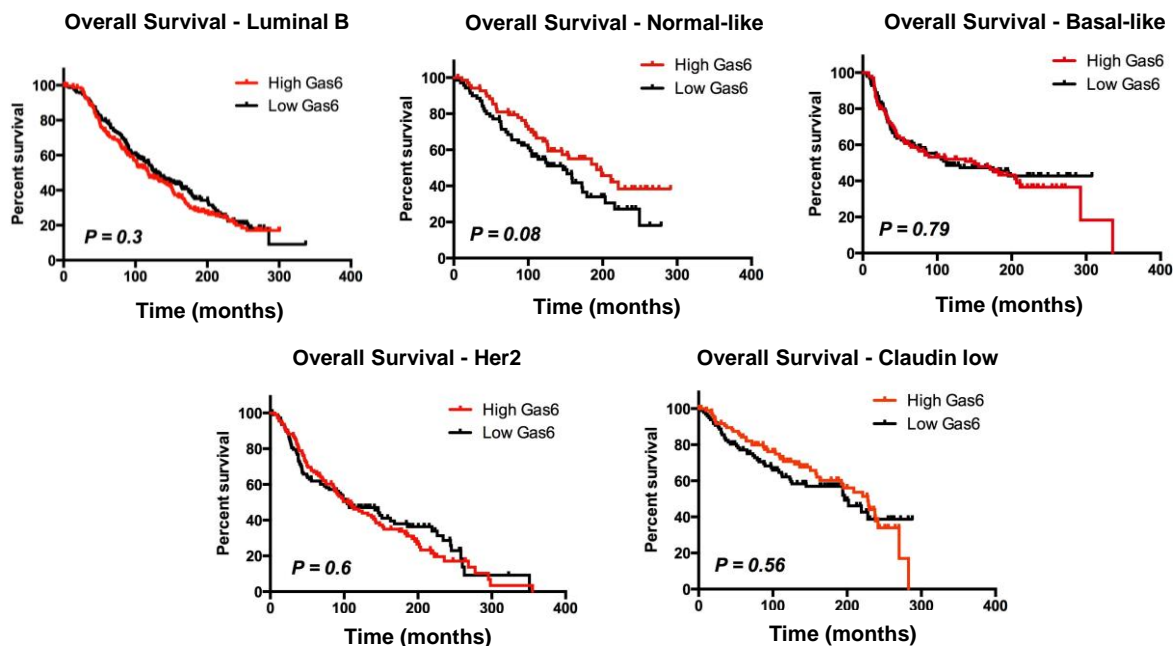

**b**

## KM plotter

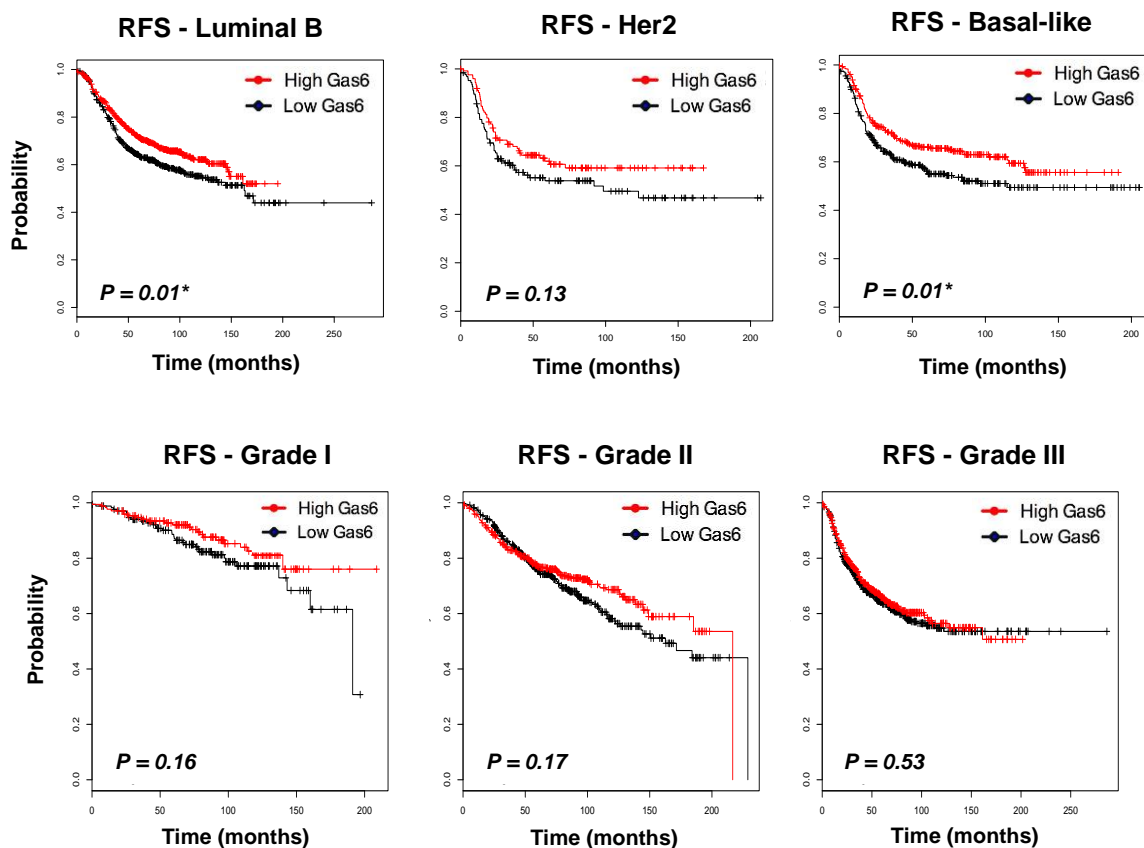

**Supplementary Figure 5: Survival status of patients classified by subtype expressing high or low Gas6 mRNA.** **a** Overall survival in luminal B, normal-like, Her2<sup>+</sup>, basal-like and claudin low patients, with high and low levels of Gas6 mRNA. Graphs were generated using METABRIC dataset. **b** Kaplan Meier plots representing RFS of treated breast cancer luminal B, Her2<sup>+</sup> and basal-like patients, in addition to RFS of treated patients with Grades I, II and III. Log-rank, Chi squared test for statistical analysis.
